# Supplementary material
Source: PubMed Central journal article supplement (PMC10327328)
Supplement: NIHMS1911282-supplement-1.pdf [file NIHMS1911282-supplement-1.pdf]

**Supplemental table 1. Protocol for obtaining facet follow-up data in individuals who sought alternative care for failed treatment.**

|                                                                                 |                                                                                                                                                                                                                                                                                                     |
|---------------------------------------------------------------------------------|-----------------------------------------------------------------------------------------------------------------------------------------------------------------------------------------------------------------------------------------------------------------------------------------------------|
| Negative MBB with no alternative care before 1-month visit.                     | Follow-up data recorded at 1-month.                                                                                                                                                                                                                                                                 |
| Negative MBB in a person who alternative care was provided (e.g. prescription). | 1-month follow-up data recorded before care was started (i.e. failed treatment). For those with a negative block in whom care was started within days without a formal follow-up, baseline observations were carried forward (i.e. failed treatment).                                               |
| Prolonged relief from a negative MBB.                                           | 1- and 3-month follow-ups recorded at set times in those who experienced > 3 months relief. In those who experienced > 1-month but < 3-months relief, 1-month follow-up recorded at set time and 3-month data recorded when pain returned, before treatment was instituted (i.e. failed treatment). |
| Prolonged relief from a positive MBB lasting > 3 months                         | 1- and 3-month follow-ups recorded at set times.                                                                                                                                                                                                                                                    |
| Prolonged relief from a positive MBB lasting > 1 month but < 3 months           | 1-month follow-up recorded 1-month after MBB. 3-month follow-up recorded 3 months after RFA.                                                                                                                                                                                                        |
| Relief after RFA lasting 1, but not 3 months.                                   | 1-month follow-up recorded 1-month after RFA. 3-month follow-up recorded at 3 months in those who did not receive interim care, or after return of pain but before treatment was instituted in those received interim care (i.e. failed treatment).                                                 |

MBB- medial branch block

**Supplemental Table 2. Factors Associated with Primary Outcome (Change in Average NRS Primary Location Pain Score) for Therapeutic LBP Procedures.**

| Variable                                                           | Unadjusted Coefficient (95% CI) | P-Value | Adjusted Coefficient, Full Model (95% CI) | P-Value | Adjusted Coefficient, Simplified Model (95% CI) | P-Value |
|--------------------------------------------------------------------|---------------------------------|---------|-------------------------------------------|---------|-------------------------------------------------|---------|
| Age, years                                                         | -0.030 (-0.051, -0.009)         | 0.006   | -0.021 (-0.043, 0.00047)                  | 0.055   |                                                 |         |
| Duration of Pain, years                                            | 0.034 (-0.010, 0.079)           | 0.13    | 0.026 (-0.018, 0.070)                     | 0.25    |                                                 |         |
| Obesity                                                            | 0.53 (-0.07, 1.13)              | 0.084   | 0.56 (-0.034, 1.15)                       | 0.065   | 0.62 (0.038, 1.21)                              | 0.037   |
| Smoking                                                            | 0.64 (-0.091, 1.37)             | 0.086   | 0.45 (-0.29, 1.19)                        | 0.24    |                                                 |         |
| Any Daily Opioid Use                                               | 0.32 (-0.29, 0.93)              | 0.30    | 0.39 (-0.24, 1.02)                        | 0.22    |                                                 |         |
| Athens Insomnia Scale (mean $\pm$ SD)                              | 0.067 (0.013, 0.12)             | 0.015   | 0.0072 (-0.071, 0.086)                    | 0.86    |                                                 |         |
| Quick Inventory of Depressive Symptomatology (QIDS; mean $\pm$ SD) | 0.060 (0.023, 0.098)            | 0.002   | 0.044 (-0.012, 0.099)                     | 0.12    | 0.076 (0.039, 0.113)                            | <0.0001 |
| Nonorganic Signs, number                                           | 0.19 (-0.059, 0.45)             | 0.131   | 0.06 (-0.23, 0.35)                        | 0.68    |                                                 |         |
| Oswestry Disability Score (mean $\pm$ SD)                          | 0.014 (-0.0040, 0.032)          | 0.13    | 0.0016 (-0.0074, 0.039)                   | 0.18    |                                                 |         |
| Average Baseline NRS Primary Pain Location Score                   | -0.23 (-0.39, -0.072)           | 0.004   | -0.39 (-0.57, -0.20)                      | <0.0001 | -0.32 (-0.48, -0.16)                            | <0.0001 |

1. Coefficients are reported as change in NRS pain score with presence (for categorical variables) or each single unit increase (for continuous variables) in the specified variable, with negative coefficients being associated with improved pain reduction.
